1

2

3 **Viral mediated tethering to SEL1L facilitates ER-associated degradation of IRE1**

4

5

6 Florian Hinte, Jendrik Müller, and Wolfram Brune\*

7

8 Heinrich Pette Institute, Leibniz Institute for Experimental Virology, Hamburg, Germany

9

10 \* corresponding author. wolfram.brune@leibniz-hpi.de

11

12 Running head: MCMV M50 promotes ER-associated degradation of IRE1

13

14

15 Word count

16 Abstract: 249

17 Text: 3275 (w/o references)

18 Figures: 7

19 **Abstract**

20 The unfolded protein response (UPR) and endoplasmic reticulum (ER)-associated  
21 degradation (ERAD) are two essential components of the quality control system for proteins  
22 in the secretory pathway. When unfolded proteins accumulate in the ER, UPR sensors such  
23 as IRE1 induce the expression of ERAD genes, thereby increasing protein export from the ER  
24 to the cytosol and subsequent degradation by the proteasome. Conversely, IRE1 itself is an  
25 ERAD substrate, indicating that the UPR and ERAD regulate each other. Viruses are  
26 intracellular parasites that exploit the host cell for their own benefit. Cytomegaloviruses  
27 selectively modulate the UPR to take advantage of beneficial and inhibit detrimental effects  
28 on viral replication. We have previously shown that murine and human cytomegaloviruses  
29 express homologous proteins (M50 and UL50, respectively) that dampen the UPR at late  
30 times post infection by inducing IRE1 degradation. However, the degradation mechanism  
31 has remained uncertain. Here we show that the cytomegalovirus M50 protein mediates IRE1  
32 degradation by the proteasome. M50-dependent IRE1 degradation can be blocked by  
33 pharmacological inhibition of p97/VCP or by genetic ablation of SEL1L, both of which are  
34 component of the ERAD machinery. SEL1L acts as a cofactor of the E3 ubiquitin ligase HRD1,  
35 while p97/VCP is responsible for the extraction of ubiquitylated proteins from the ER to the  
36 cytosol. We further show that M50 facilitates the IRE1-SEL1L interaction by binding to both,  
37 IRE1 and SEL1L. These results indicate that the viral M50 protein dampens the UPR by  
38 tethering IRE1 to SEL1L, thereby promoting its degradation by the ERAD machinery.

39 **Importance**

40 Viruses infect cells of their host and force them to produce virus progeny. This can impose  
41 stress on the host cell and activate counter-regulatory mechanisms. Protein overload in the  
42 endoplasmic reticulum (ER) leads to ER stress and triggers the unfolded protein response,  
43 which in turn upregulates protein folding and increases the degradation of proteins in the  
44 ER. Previous work has shown that cytomegaloviruses interfere with the unfolded protein  
45 response by degrading the sensor molecule IRE1. Herein we demonstrate how the viral M50  
46 protein exploits the ER-associated degradation machinery to dispose of IRE1. Degradation of  
47 IRE1 curbs the unfolded protein response and helps the virus to increase the synthesis of its  
48 own proteins.

49

## 50 Introduction

51 The ER is a cellular compartment responsible for synthesis, assembly, and trafficking of  
52 secretory and membrane proteins (1). To maintain protein homeostasis, cells must ensure  
53 proper protein folding and maturation. When the load of newly synthesized proteins and the  
54 folding capacity get out of balance, unfolded and misfolded proteins accumulate in the ER,  
55 resulting in ER stress (2). To maintain ER homeostasis, cells have evolved quality control  
56 systems and counter-regulatory mechanisms.

57 While protein aggregates in the ER are removed by autophagy, the primary mechanism for  
58 the disposal of ER-resident proteins is ER-associated degradation (ERAD) (3, 4). ERAD  
59 involves ubiquitylation and retrotranslocation of proteins from the ER to the cytosol, where  
60 proteasomal degradation takes place. The best-characterized and most conserved ERAD  
61 machinery in mammalian cells consists of the SEL1L-HRD1 protein complex and the  
62 transitional ER ATPase p97, also known as valosin-containing protein (VCP). Ubiquitylation is  
63 mediated by the E3 ubiquitin ligase HRD1 (also known as Synoviolin, SYVN1), which resides  
64 in the ER membrane and uses SEL1L as a cofactor (5). Ubiquitylated ERAD substrates are  
65 extracted from the ER membrane and translocated to the cytosol in an energy-dependent  
66 process mediated by the p97/VCP, a protein of the AAA (ATPases associated with diverse  
67 cellular activities) family (6).

68 Accumulation of unfolded or misfolded proteins in the ER triggers the unfolded protein  
69 response (UPR). It relies on three sensors, IRE1, PERK, and ATF6, which are activated upon  
70 ER stress and mediate signal transduction from the ER to the cytosol and the nucleus  
71 (reviewed in (7)). The PKR-like ER kinase (PERK) phosphorylates the translation initiation  
72 factor eIF2 $\alpha$ , thereby reducing protein translation. The other two sensors, the inositol-  
73 requiring enzyme 1 (IRE1, also known as IRE1 $\alpha$  or ER-to-nucleus signaling 1, ERN1) and the  
74 activating transcription factor 6 (ATF6), activate the transcription factors X-box binding  
75 protein 1-spliced (XBP1s) and ATF6(N), respectively. XBP1s and ATF6(N) stimulate the  
76 expression of chaperones, foldases, and components of the ERAD machinery. Thus, the three  
77 UPR sensors restore ER homeostasis by reducing the protein load and by increasing the  
78 protein folding capacity (7). Intriguingly, the UPR and ERAD regulate each other: the UPR  
79 sensors that upregulate ERAD (i.e., IRE1 and ATF6) are themselves subject to ERAD (8). IRE1  
80 is recognized by the substrate recognition factor OS9 and is degraded by the SEL1L-HRD1

81 ERAD complex as part of its natural turnover (9). A similar mechanism has been described for  
82 ATF6 (10).

83 Viral replication within the host cell requires the synthesis of substantial amounts of viral  
84 proteins. Especially during the late phase of the viral life cycle, large quantities viral envelope  
85 glycoproteins and immunomodulatory transmembrane proteins have to be synthesized. This  
86 can overwhelm the folding and processing capacity of the ER and cause ER stress (11). Many  
87 viruses, particularly those of the *Herpesviridae* family, have evolved means to modulate the  
88 UPR and to exploit ERAD to their own benefit (reviewed in (12)).

89 Human cytomegaloviruses (HCMV, human herpesvirus 5) is an opportunistic pathogen and a  
90 leading cause of morbidity and mortality in immunocompromised patients. It is also the  
91 leading cause of congenital infections, which can result in long-term neurological deficits (13,  
92 14). Murine cytomegalovirus (MCMV) is a related herpesvirus of mice, which serves as a  
93 small animal model for HCMV (15). During co-evolution with their respective hosts, the  
94 CMVs have acquired the ability to activate and regulate the UPR, as shown in pioneering  
95 work by the laboratory of James Alwine (16-19). Subsequent work by several laboratories  
96 has shown that HCMV and MCMV manipulate all three branches of the UPR (reviewed in  
97 (12)). For instance, we have recently shown that MCMV briefly activates the IRE1-XBP1  
98 signaling pathway during the first few hours of infection to relieve repression by XBP1u, the  
99 product of the unspliced *Xbp1* mRNA. XBP1u inhibits viral gene expression and replication by  
100 blocking the activation of the viral major immediate-early promoter by XBP1s and ATF6(N)  
101 (20). At late times post infection, MCMV inhibits IRE1-dependent signaling by  
102 downregulating IRE1 levels to prevent deleterious effects of the UPR on virus progeny  
103 production. The MCMV protein M50 interacts with IRE1 and causes its degradation, a  
104 function it shares with its homolog in HCMV, UL50 (21). However, the precise mechanism of  
105 IRE1 degradation has remained unknown.

106 Herein we show that M50 reduces IRE1 protein levels by inducing its degradation via the  
107 proteasome. M50-mediated IRE1 degradation depends on p97/VCP and SEL1L, two  
108 component of the ERAD machinery. We further show that M50 interacts with both, IRE1 and  
109 SEL1L, suggesting that it functions as a viral adaptor which facilitates the interaction of the  
110 two proteins. These findings indicate that the viral M50 protein inhibits the IRE1 branch of

111 the UPR by tethering IRE1 to SEL1L, thereby promoting its degradation by the ERAD  
112 machinery.

113

## 114 **Results**

### 115 **M50 induces proteasomal degradation of IRE1.**

116 We have previously shown that M50 reduces IRE1 protein levels by reducing its stability (21).  
117 However, the mechanism of IRE1 degradation has not been resolved. Attempts to inhibit  
118 IRE1 degradation with lysosomal inhibitors were unsuccessful, suggesting that degradation  
119 does not occur by autophagy (21). However, since it has been shown that IRE1 is subject to  
120 ERAD during its natural turnover (9), we tested whether M50-induced IRE1 degradation can  
121 be inhibited with a proteasome inhibitor. Mouse embryonic fibroblasts (MEFs) were  
122 transfected with plasmids encoding Myc-tagged IRE1 and either FLAG-tagged full-length  
123 M50 or a C-terminally truncated M50 (1-276) mutant, which does not induce IRE1  
124 degradation (21). Cell lysates were harvested 48 hours after transfection and analyzed by  
125 immunoblot. The proteasome inhibitor MG-132 or DMSO (vector control) was added during  
126 the last 5½ hours before harvesting. As shown in Fig. 1A, MG-132 treatment inhibited M50-  
127 induced IRE1 degradation.

128 Next, we tested whether MG-132 also inhibits IRE1 degradation in MCMV-infected cells,  
129 which occurs at late times post infection. MEFs were infected with MCMV-GFP, and IRE1  
130 levels were analyzed at late times post infection. Treatment with MG-132 strongly increased  
131 IRE1 levels in MCMV-infected cells (Fig. 1B), suggesting that IRE1 degradation in infected  
132 cells occurred via the proteasome.

133 To test whether M50 induces proteasomal degradation of polyubiquitinated IRE1, we  
134 transfected MEFs with IRE1 and M50 expression plasmids and a plasmid expressing HA-  
135 tagged ubiquitin. A modified “K48-only” ubiquitin, which can only form K48-linked ubiquitin  
136 chains (22), was used in order to analyze the type of polyubiquitylation associated with  
137 proteasomal degradation. Myc-tagged IRE1 was immunoprecipitated, and ubiquitylated IRE1  
138 was detected by immunoblotting. As expected, IRE1 overexpression resulted in a substantial  
139 level of polyubiquitylated IRE1 (Fig. 1C). In the presence of full-length M50, the level of  
140 polyubiquitylated IRE1 was massively decreased, and this effect was largely reversed when

141 cells were treated with the proteasome inhibitor MG-132 (Fig. 1C). These findings suggested  
142 that M50 induces ubiquitylation and proteasomal degradation of IRE1.

143 ER-associated degradation of an ER membrane protein requires substrate recognition,  
144 polyubiquitination by an E3 ubiquitin ligase, and extraction from the ER membrane into the  
145 cytosol, where proteasomal degradation takes place. Extraction is mediated by the ATPase  
146 p97/VCP. Therefore, we used a specific p97 inhibitor to test whether M50-induced IRE1  
147 degradation occurred via ERAD. In experiments analogous to those shown in Fig. 1A and B,  
148 the p97 inhibitor CB-5083 inhibited IRE1 degradation in M50-transfected as well as MCMV-  
149 infected cells (Fig. 2A and B).

150

### 151 **M50 interacts with SEL1L.**

152 During its natural turnover, IRE1 is recognized by the substrate recognition factor OS9, which  
153 functions as an adaptor protein of the SEL1L-HRD1 complex (9). We hypothesized that M50  
154 could act as a viral adaptor protein that interacts with both, IRE1 and SEL1L. To test this  
155 hypothesis, HEK 293A cells were transfected with plasmids expressing Myc-tagged IRE1,  
156 FLAG-tagged M50, and untagged SEL1L. While IRE1 interacted only weakly with SEL1L in  
157 immunoprecipitation experiments, M50 interacted with both SEL1L and IRE1 (Fig. 3A).  
158 Expression of full-length M50 massively increased the interaction of IRE1 with SEL1L,  
159 whereas expression of the truncated M50(1-276) mutant did not (Fig. 3B). These results  
160 suggested that M50 acts as an adaptor protein that tethers IRE1 to SEL1L.

161

### 162 **Genetic ablation of *Sel1L* abolishes M50-mediated IRE1 degradation.**

163 To test whether SEL1L is required for the M50-mediated IRE1 degradation, we generated  
164 *Sel1L* knockout MEFs by CRISPR/Cas9 gene editing. Two independent SEL1L-deficient cell  
165 clones were obtained with different guide RNAs (Fig. 4A). As SEL1L is involved in IRE1's  
166 natural turnover, IRE1 levels are substantially increased SEL1L-deficient cells (9). Consistent  
167 with this published observation, we detected increased IRE1 protein levels in our *Sel1L*  
168 knockout MEFs (Fig. 4A). However, *Ire1* transcript levels were not significantly altered in  
169 these cells (Fig. 4B), confirming that impaired degradation rather than increased synthesis is  
170 responsible. Increased IRE1 protein levels correlated with increased *Xbp1* mRNA splicing and

171 increased transcription of *Chop*, an XBP1s target gene (Fig. 4B). These results indicated that  
172 IRE1 protein levels and IRE1-mediated signaling are elevated in the absence of SEL1L.

173 Next, we tested whether the absence of SEL1L affects M50-induced IRE1 degradation. WT  
174 and *Sel1L* ko MEF were transfected with IRE1 and M50 expression plasmids. Expression of  
175 full-length M50 reduced IRE1 levels in WT MEF but not in SEL1L-deficient MEFs (Fig. 5A).  
176 Similarly, MCMV infection resulted in a strong reduction of IRE1 levels at late times post  
177 infection in WT but not in *Sel1L* ko MEF (Fig. 5B). We also analyzed IRE1 signaling in MCMV-  
178 infected MEF by treating cells with thapsigargin (Tg), a potent activator of the UPR.  
179 Consistent with previously published data (21), IRE1-mediated *Xbp1* splicing was massively  
180 reduced in MCMV-infected WT MEFs at late times post infection (Fig. 5C). In contrast, *Xbp1*  
181 splicing was only minimally affected by MCMV in *Sel1L* ko MEF. These results demonstrated  
182 that MCMV cannot downregulate IRE1 protein levels and IRE1 signaling in the absence of  
183 SEL1L.

184

#### 185 ***Sel1L* knockout affects viral gene expression.**

186 We have recently shown that MCMV briefly activated IRE1-mediated signaling at early times  
187 post infection to boost the activation of the viral major immediate-early promoter (20). At  
188 late times post infection, MCMV M50 downregulates IRE1 (21), presumably to avoid effects  
189 of the UPR that are detrimental for the virus. As SEL1L deficiency results in increased IRE1  
190 levels, increased *Xbp1* splicing, and an inability of MCMV to downregulate IRE1 and inhibit  
191 IRE1 signaling at late times post infection (Fig. 5), we wanted to determine how SEL1L  
192 deficiency affects MCMV gene expression at early (2-8 hpi) and late (24-72 hpi) times post  
193 infection. As shown in Fig. 6, expression of the viral immediate-early 1 (IE1) protein was  
194 increased in *Sel1L* ko MEF at early times, but expression of viral early (M57) and late  
195 (glycoprotein B) proteins at later times was reduced or delayed. These results suggested that  
196 SEL1L deficiency impairs viral protein expression at late times post infection.

197

#### 198 **Discussion**

199 In this study, we show that M50 interacts with IRE1 and SEL1L and induces IRE1 degradation  
200 via the canonical SEL1L-HRD1 ERAD pathway. Thus, M50 functions as a viral adaptor protein

201 that tethers IRE1 to the SEL1L-HRD1 complex, thereby accelerating its decay (Fig. 7). The  
202 crucial role of SEL1L in M50-mediated IRE1 degradation was demonstrated with *Se/1L* ko  
203 cells, in which M50-mediated IRE1 degradation was abolished (Fig. 5). In these cells, viral  
204 protein expression was impaired at late times post infection (Fig. 6). This observation  
205 suggests that M50-mediated IRE1 degradation is beneficial for MCMV to secure viral protein  
206 expression in the late phase of infection. However, one has to consider that IRE1 is only one  
207 of many endogenous substrates of the SEL1L-HRD1 ERAD pathway. Thus, *Se/1L* knockout will  
208 most certainly also affect the turnover of many other cellular proteins. It has been shown  
209 that an acutely induced *Se/1L* knockout leads to an ERAD defect and a dilated ER (23).  
210 Studies with permanently SEL1L-deficient cells must therefore be interpreted with caution as  
211 these cells likely activate compensatory pathways to restore ER homeostasis and preserve  
212 cell viability. Proteasome inhibitors and inhibitors of the AAA ATPase p97 are even less  
213 useful for studying the biological importance of M50-induced IRE1 degradation as they affect  
214 many cellular functions besides ERAD. The best way to address this important question  
215 would be to use an M50 mutant that has selectively lost the ability to interact with SEL1L or  
216 with IRE1, but is otherwise fully functional, particularly with respect to M50's function in  
217 nuclear egress of capsids. Unfortunately, such an M50 mutant has not been identified yet.

218 The SEL1L-HRD1 complex is the most conserved and best-characterized ERAD complex in  
219 mammalian cells. However, several other ERAD complexes have been described, which use  
220 different E3 ubiquitin ligases such as GP78, MARCHF6, RNF5, RNF103, RNF170, TMEM129,  
221 TRC8, TRIM13, or ZNRF4 (3, 8). A number of viruses exploit the ERAD pathway for the  
222 purpose of immune evasion or to provide an environment conducive to viral replication (24).  
223 The HCMV US2 and US11 proteins have been instrumental in studies of the mammalian  
224 ERAD system. They exploit separate components of the ERAD system to degrade MHC class I  
225 heavy chains, thereby impeding recognition of infected cells by cytotoxic T lymphocytes (25).  
226 While US2 appropriates the E3 ubiquitin ligase TRC8 to ubiquitylate MHC-I heavy chains (26),  
227 US11 uses a complex consisting of Derlin-1 and the E3 ligase TMEM129 (27, 28). Earlier  
228 studies have reported an association of US11 with SEL1L and concluded that US11 might  
229 induce MHC-I degradation via the canonical SEL1L-HRD1 complex (29). However, more  
230 recent work demonstrated that US11 promotes MHC-I degradation through the TMEM129-  
231 Derlin-1 complex, whereas US11 itself is subject to degradation via the SEL1L-HRD1 complex  
232 (27, 28).



233 M50 and UL50 are type II transmembrane proteins with a C-terminal membrane-spanning  
234 domain. In virus-infected cells, these proteins localize to the ER and the nuclear envelope,  
235 which is continuous with the ER. M50 and UL50 associate with the nuclear proteins M53 and  
236 UL53, respectively, leading to their accumulation at the inner nuclear membrane, where they  
237 recruit viral or cellular kinases to disrupt the nuclear lamina and facilitate nuclear egress of  
238 viral capsids. This important function of M50/UL50 and their respective partner proteins is  
239 highly conserved among the *Herpesviridae* and has been investigated extensively (reviewed  
240 in (30)). Apart from their function in nuclear egress, M50 and UL50 have additional functions  
241 such as the ability to interact with the UPR sensor IRE1 and induce its degradation (21). We  
242 show here that the HCMV M50 protein triggers degradation of IRE1 via the canonical SEL1L-  
243 HRD1 ERAD pathway. It is the same pathway, which the cell uses for IRE1 degradation during  
244 the natural turnover of IRE1 (9). This function requires interaction with SEL1L, a component  
245 of the canonical SEL1L-HRD1 ERAD complex (Fig. 5).

246 The HCMV UL50 protein can also induce IRE1 degradation in a similar way as M50 does (21).  
247 It seems likely that this occurs by the same or a very similar mechanism as the one we  
248 describe here for M50. However, this remains to be formally proven. Interestingly, two  
249 recent studies have shown that UL50 interacts with the ERAD machinery. It interacts with  
250 the ubiquitin-like modifier-activating enzyme 7 (UBA7, also known as UBE1L) and the ER-  
251 associated ubiquitin ligase RNF170 to induce ubiquitylation and proteasomal degradation of  
252 UBE1L (31). RNF170 is an as-yet poorly characterized E3 ubiquitin ligase involved in ERAD of  
253 the inositol trisphosphate receptor (32). It is unknown whether RNF170 can use SEL1L as a  
254 cofactor as HRD1 does. Nevertheless, it remains possible that RNF170 is somehow involved  
255 in the degradation of IRE1. A recent study has shown that UL50 also interacts with p97/VCP  
256 and downregulates p97 protein levels (33). How exactly UL50 downregulates p97 remains  
257 unclear. Interestingly, a short isoform of UL50 lacking the N-terminal 198 amino acids  
258 counteracts the downregulation of p97 by the full-length UL50 protein (33). This  
259 autoregulatory mechanism appears to be important for viral gene expression, probably  
260 because p97/VCP affects the splicing of the major immediate-early transcripts and the  
261 expression of the major viral transactivator protein, IE2 (34).

262 UL148 is another HCMV protein that directly affects UPR signaling. It triggers activation of  
263 PERK and IRE1 and remodels the ER (35, 36). Moreover, it regulates the composition of the  
264 viral gH-gL glycoprotein complex by interacting with the immature gH-gL complex (37) and

265 by increasing the stability of gO, which is rapidly degraded via ERAD. Stabilization of gO  
266 involves interaction of UL148 with SEL1L, suggesting that UL148 dampens the activity of the  
267 SEL1L-HRD1 ERAD complex (38). Thus, interaction of viral proteins with SEL1L can either  
268 dampen ERAD, as shown for UL148, or promote ERAD, as shown here for M50.

269

## 270 **Materials and Methods**

### 271 **Cells and virus**

272 The following cell lines were used: immortalized MEFs (39), 10.1 fibroblasts (40), HEK 293A  
273 (Invitrogen) and HEK 293T cells (ATCC, CL-11268). Cells were grown under standard  
274 conditions in Dulbecco's modified Eagle's medium supplemented with 10% fetal calf serum,  
275 100 IU/ml penicillin and 100 µg/ml streptomycin (Sigma).

276 MCMV-GFP (41) was propagated and titrated on 10.1 fibroblasts. Viral titers were  
277 determined by using the median tissue culture infective dose (TCID<sub>50</sub>) method.

278

### 279 **Plasmids and transfection**

280 Plasmids pcDNA3-mIRE1-3xmyc, hIRE1-HA, M50-Flag, and M50(1-276)-Flag were described  
281 previously (21). A pcDNA3.1 plasmid encoding HA-tagged K48-only Ub (22) was kindly  
282 provided by Vishva Dixit (Genentech). The murine *Se11L* gene was PCR-amplified from  
283 pCMV6-Sel1L-Myc-DDK (OriGene) and subcloned in pcDNA3. HEK-293A cells were transiently  
284 transfected polyethylenimine (Sigma), and MEFs were transfected using GenJet (SignaGen).

285

### 286 **CRISPR/Cas9 gene editing**

287 CRISPR/Cas9 gene editing was used to generate *Se11L* knockout MEFs essentially as  
288 described (20, 42). Briefly, two different guide RNAs (5'-GTCGTTGCTGCTGCTCTGCG-3' and  
289 5'-GCTGCTCTGCGCGGTGCTCC-3') targeting the murine *Se11L* gene were designed using E-  
290 CRISP (<http://www.e-crisp.org/E-CRISP/designcrispr.html>) and inserted into the lentiviral  
291 vector pSicoR-CRISPR-puroR (kindly provided by R. J. Lebbink, University Medical Center  
292 Utrecht, Netherlands). Lentiviruses were produced in HEK-293T cells using standard third-  
293 generation packaging. Lentiviruses were used to transduce MEFs in the presence of 5 µg/ml  
294 polybrene (Sigma). Cells were selected with 1.5 µg/ml puromycin (Sigma), and single cell  
295 clones were obtained by limiting dilution.

296

## 297 **Immunoprecipitation and immunoblot analysis**

298 Whole cell lysates were obtained by lysing cells in RIPA buffer supplemented with a  
299 cComplete Mini protease inhibitor cocktail (Roche). Protein concentrations were measured  
300 using a BCA assay (Thermo Fisher Scientific). Equal protein amounts were boiled in sample  
301 buffer and subjected to SDS-PAGE and semi-dry blotting onto nitrocellulose membranes. For  
302 immunodetection, antibodies against the following proteins and epitopes were used: HA  
303 (16B12, BioLegend),  $\beta$ -actin (AC-74, Sigma), IRE1 (14C10, Cell Signaling), SEL1L (151545,  
304 Biomol). Monoclonal antibodies against MCMV IE1 (CROMA101), M57 (M57.02), and  
305 M55/gB (SN1.07) were from the Center for Proteomics, University of Rijeka, Croatia.  
306 Secondary antibodies coupled to horseradish peroxidase (HRP) were purchased from Dako.  
307 Detection of IRE1 ubiquitination was done as described in detail elsewhere (43).

308

## 309 **RNA isolation and quantitative PCR**

310 Total RNA was isolated from WT and *Sel1L* ko MEFs using an innuPREP RNA Mini Kit  
311 (Analytik-Jena). Reverse transcription and cDNA synthesis was carried out with 2  $\mu$ g RNA  
312 using 200 U RevertAid H Minus Reverse Transcriptase, 100 pmol Oligo(dT)<sub>18</sub>, and 20 U RNase  
313 inhibitor (Thermo Fisher Scientific). Quantitative real-time PCR reactions employing SYBR  
314 Green were run on a 7900HT Fast Real-Time PCR System (Applied Biosystems). PCR primers  
315 for *Xbp1s*, *Xbp1u*, *Gapdh*, and *Ire1* have been described (20, 21). *Chop* was amplified with  
316 primers 5'-TATCTCATCCCCAGGAAACG-3' and 5'-GGGCACTGACCACTCTGTTT-3'. Reactions  
317 were performed under the following conditions: 45 cycles of 3 sec at 95°C and 30 sec at  
318 60°C. Three replicates were analyzed for each condition, and the relative amounts of mRNAs  
319 were calculated from the comparative threshold cycle (Ct) values by using *Gapdh* as  
320 reference.

321

## 322 **Inhibitors**

323 The proteasome inhibitor MG-132 was purchased from Sigma. The AAA ATPase Inhibitor CB-  
324 5083 was from Xcessbio.

325

## 326 **Statistical analysis**

327 All statistical analyses were performed with GraphPad Prism 5.0 software. One-way ANOVA  
328 followed by Bonferroni's post hoc test was used for the analysis of qPCR experiments.

329

## 330 **Acknowledgments**

331 We thank Elena Muscolino and Olha Puhach for critical readings of the manuscript.

332 This study was supported by the Deutsche Forschungsgemeinschaft (grant BR1730/6-1 to  
333 W.B.). The Heinrich Pette Institute is supported by the Free and Hanseatic City of Hamburg  
334 and the Federal Ministry of Health. The funders had no role in study design, data collection  
335 and interpretation, or the decision to submit the work for publication.

336

## 337 **References**

- 338 1. **Braakman I, Hebert DN.** 2013. Protein folding in the endoplasmic reticulum. Cold  
339 Spring Harb Perspect Biol **5**:a013201.
- 340 2. **Guerriero CJ, Brodsky JL.** 2012. The delicate balance between secreted protein  
341 folding and endoplasmic reticulum-associated degradation in human physiology. *Physiol Rev*  
342 **92**:537-576.
- 343 3. **Olzmann JA, Kopito RR, Christianson JC.** 2013. The mammalian endoplasmic  
344 reticulum-associated degradation system. *Cold Spring Harb Perspect Biol* **5**:a013185.
- 345 4. **Senft D, Ronai ZA.** 2015. UPR, autophagy, and mitochondria crosstalk underlies the  
346 ER stress response. *Trends Biochem Sci* **40**:141-148.
- 347 5. **Christianson JC, Ye Y.** 2014. Cleaning up in the endoplasmic reticulum: ubiquitin in  
348 charge. *Nature structural & molecular biology* **21**:325-335.
- 349 6. **Ye Y, Shibata Y, Kikkert M, van Voorden S, Wiertz E, Rapoport TA.** 2005.  
350 Recruitment of the p97 ATPase and ubiquitin ligases to the site of retrotranslocation at the  
351 endoplasmic reticulum membrane. *Proc Natl Acad Sci U S A* **102**:14132-14138.
- 352 7. **Hetz C, Zhang K, Kaufman RJ.** 2020. Mechanisms, regulation and functions of the  
353 unfolded protein response. *Nature reviews. Molecular cell biology* **21**:421-438.
- 354 8. **Hwang J, Qi L.** 2018. Quality Control in the Endoplasmic Reticulum: Crosstalk  
355 between ERAD and UPR pathways. *Trends Biochem Sci* **43**:593-605.
- 356 9. **Sun S, Shi G, Sha H, Ji Y, Han X, Shu X, Ma H, Inoue T, Gao B, Kim H, Bu P, Guber RD,**  
357 **Shen X, Lee AH, Iwawaki T, Paton AW, Paton JC, Fang D, Tsai B, Yates JR, 3rd, Wu H,**  
358 **Kersten S, Long Q, Duhamel GE, Simpson KW, Qi L.** 2015. IRE1alpha is an endogenous  
359 substrate of endoplasmic-reticulum-associated degradation. *Nat Cell Biol* **17**:1546-1555.
- 360 10. **Horimoto S, Ninagawa S, Okada T, Koba H, Sugimoto T, Kamiya Y, Kato K, Takeda S,**  
361 **Mori K.** 2013. The unfolded protein response transducer ATF6 represents a novel  
362 transmembrane-type endoplasmic reticulum-associated degradation substrate requiring  
363 both mannose trimming and SEL1L protein. *J Biol Chem* **288**:31517-31527.

- 364 11. **Zhang L, Wang A.** 2012. Virus-induced ER stress and the unfolded protein response.  
365 *Front Plant Sci* **3**:293.
- 366 12. **Johnston BP, McCormick C.** 2019. Herpesviruses and the Unfolded Protein Response.  
367 *Viruses* **12**:17.
- 368 13. **Griffiths P, Baraniak I, Reeves M.** 2015. The pathogenesis of human cytomegalovirus.  
369 *J Pathol* **235**:288-297.
- 370 14. **Mocarski ES, Shenk T, Griffiths PD, Pass RF.** 2013. Cytomegaloviruses, p. 1960-2014.  
371 *In* Knipe DM, Howley PM (ed.), *Fields Virology*, 6th edition. Lippincott, Williams & Wilkins,  
372 Philadelphia.
- 373 15. **Brizic I, Lisnic B, Brune W, Hengel H, Jonjic S.** 2018. Cytomegalovirus Infection:  
374 Mouse Model. *Curr Protoc Immunol* **122**:e51.
- 375 16. **Isler JA, Skalet AH, Alwine JC.** 2005. Human cytomegalovirus infection activates and  
376 regulates the unfolded protein response. *J Virol* **79**:6890-6899.
- 377 17. **Buchkovich NJ, Maguire TG, Yu Y, Paton AW, Paton JC, Alwine JC.** 2008. Human  
378 cytomegalovirus specifically controls the levels of the endoplasmic reticulum chaperone  
379 BiP/GRP78, which is required for virion assembly. *J Virol* **82**:31-39.
- 380 18. **Buchkovich NJ, Yu Y, Pierciey FJ, Jr., Alwine JC.** 2010. Human cytomegalovirus  
381 induces the endoplasmic reticulum chaperone BiP through increased transcription and  
382 activation of translation by using the BiP internal ribosome entry site. *J Virol* **84**:11479-  
383 11486.
- 384 19. **Yu Y, Pierciey FJ, Jr., Maguire TG, Alwine JC.** 2013. PKR-like endoplasmic reticulum  
385 kinase is necessary for lipogenic activation during HCMV infection. *PLoS Pathog* **9**:e1003266.
- 386 20. **Hinte F, van Anken E, Tirosh B, Brune W.** 2020. Repression of viral gene expression  
387 and replication by the unfolded protein response effector XBP1u. *Elife* **9**:e51804.
- 388 21. **Stahl S, Burkhart JM, Hinte F, Tirosh B, Mohr H, Zahedi RP, Sickmann A, Ruzsics Z,  
389 Budt M, Brune W.** 2013. Cytomegalovirus downregulates IRE1 to repress the unfolded  
390 protein response. *PLoS Pathog* **9**:e1003544.
- 391 22. **Wertz IE, O'Rourke KM, Zhou H, Eby M, Aravind L, Seshagiri S, Wu P, Wiesmann C,  
392 Baker R, Boone DL, Ma A, Koonin EV, Dixit VM.** 2004. De-ubiquitination and ubiquitin ligase  
393 domains of A20 downregulate NF-kappaB signalling. *Nature* **430**:694-699.
- 394 23. **Sun S, Shi G, Han X, Francisco AB, Ji Y, Mendonca N, Liu X, Locasale JW, Simpson  
395 KW, Duhamel GE, Kersten S, Yates JR, 3rd, Long Q, Qi L.** 2014. Sel1L is indispensable for  
396 mammalian endoplasmic reticulum-associated degradation, endoplasmic reticulum  
397 homeostasis, and survival. *Proc Natl Acad Sci U S A* **111**:E582-591.
- 398 24. **Frabutt DA, Zheng YH.** 2016. Arms Race between Enveloped Viruses and the Host  
399 ERAD Machinery. *Viruses* **8**:255.

- 400 25. **van der Wal FJ, Kikkert M, Wiertz E.** 2002. The HCMV gene products US2 and US11  
401 target MHC class I molecules for degradation in the cytosol. *Curr Top Microbiol Immunol*  
402 **269**:37-55.
- 403 26. **Stagg HR, Thomas M, van den Boomen D, Wiertz EJ, Drabkin HA, Gemmill RM,**  
404 **Lehner PJ.** 2009. The TRC8 E3 ligase ubiquitinates MHC class I molecules before dislocation  
405 from the ER. *J Cell Biol* **186**:685-692.
- 406 27. **van de Weijer ML, Bassik MC, Luteijn RD, Voorburg CM, Lohuis MA, Kremmer E,**  
407 **Hoeben RC, LeProust EM, Chen S, Hoelen H, Ressing ME, Patena W, Weissman JS,**  
408 **McManus MT, Wiertz EJ, Lebbink RJ.** 2014. A high-coverage shRNA screen identifies  
409 TMEM129 as an E3 ligase involved in ER-associated protein degradation. *Nat Commun*  
410 **5**:3832.
- 411 28. **van den Boomen DJ, Timms RT, Grice GL, Stagg HR, Skodt K, Dougan G, Nathan JA,**  
412 **Lehner PJ.** 2014. TMEM129 is a Derlin-1 associated ERAD E3 ligase essential for virus-  
413 induced degradation of MHC-I. *Proc Natl Acad Sci U S A* **111**:11425-11430.
- 414 29. **Mueller B, Lilley BN, Ploegh HL.** 2006. SEL1L, the homologue of yeast Hrd3p, is  
415 involved in protein dislocation from the mammalian ER. *J Cell Biol* **175**:261-270.
- 416 30. **Marschall M, Hage S, Conrad M, Alkhashrom S, Kicuntod J, Schweininger J, Kriegel**  
417 **M, Losing J, Tillmanns J, Neipel F, Eichler J, Muller YA, Sticht H.** 2020. Nuclear Egress  
418 Complexes of HCMV and Other Herpesviruses: Solving the Puzzle of Sequence Coevolution,  
419 Conserved Structures and Subfamily-Spanning Binding Properties. *Viruses* **12**:683.
- 420 31. **Lee MK, Kim YJ, Kim YE, Han TH, Milbradt J, Marschall M, Ahn JH.** 2018.  
421 Transmembrane Protein pUL50 of Human Cytomegalovirus Inhibits ISGylation by  
422 Downregulating UBE1L. *J Virol* **92**:e00462-00418.
- 423 32. **Lu JP, Wang Y, Sliter DA, Pearce MM, Wojcikiewicz RJ.** 2011. RNF170 protein, an  
424 endoplasmic reticulum membrane ubiquitin ligase, mediates inositol 1,4,5-trisphosphate  
425 receptor ubiquitination and degradation. *J Biol Chem* **286**:24426-24433.
- 426 33. **Lee MK, Hyeon S, Ahn JH.** 2020. The Human Cytomegalovirus Transmembrane  
427 Protein pUL50 Induces Loss of VCP/p97 and Is Regulated by a Small Isoform of pUL50. *J Virol*  
428 **94**:e00110-00120.
- 429 34. **Lin YT, Prendergast J, Grey F.** 2017. The host ubiquitin-dependent segregase  
430 VCP/p97 is required for the onset of human cytomegalovirus replication. *PLoS Pathog*  
431 **13**:e1006329.
- 432 35. **Siddiquey MNA, Zhang H, Nguyen CC, Domma AJ, Kamil JP.** 2018. The Human  
433 Cytomegalovirus Endoplasmic Reticulum-Resident Glycoprotein UL148 Activates the  
434 Unfolded Protein Response. *J Virol* **92**:e00896-00818.
- 435 36. **Zhang H, Read C, Nguyen CC, Siddiquey MNA, Shang C, Hall CM, von Einem J, Kamil**  
436 **JP.** 2019. The human cytomegalovirus nonstructural glycoprotein UL148 reorganizes the  
437 endoplasmic reticulum. *mBio* **10**:e02110-02119.



- 438 37. **Li G, Nguyen CC, Ryckman BJ, Britt WJ, Kamil JP.** 2015. A viral regulator of  
439 glycoprotein complexes contributes to human cytomegalovirus cell tropism. *Proc Natl Acad*  
440 *Sci U S A* **112**:4471-4476.
- 441 38. **Nguyen CC, Siddiquey MNA, Zhang H, Li G, Kamil JP.** 2018. Human Cytomegalovirus  
442 Tropism Modulator UL148 Interacts with SEL1L, a Cellular Factor That Governs Endoplasmic  
443 Reticulum-Associated Degradation of the Viral Envelope Glycoprotein gO. *J Virol* **92**:e00688-  
444 00618.
- 445 39. **Manzl C, Krumschnabel G, Bock F, Sohm B, Labi V, Baumgartner F, Logette E,**  
446 **Tschopp J, Villunger A.** 2009. Caspase-2 activation in the absence of PIDDosome formation. *J*  
447 *Cell Biol* **185**:291-303.
- 448 40. **Harvey DM, Levine AJ.** 1991. p53 alteration is a common event in the spontaneous  
449 immortalization of primary BALB/c murine embryo fibroblasts. *Genes Dev* **5**:2375-2385.
- 450 41. **Brune W, Ménard C, Heesemann J, Koszinowski UH.** 2001. A ribonucleotide  
451 reductase homolog of cytomegalovirus and endothelial cell tropism. *Science* **291**:303-305.
- 452 42. **Puhach O, Ostermann E, Krisp C, Frascaroli G, Schlüter H, Brinkmann MM, Brune W.**  
453 2020. Murine cytomegalovirus m139 targets DDX3 to curtail interferon production and  
454 promote viral replication. *PLoS Pathog* (**in press**).
- 455 43. **Choo YS, Zhang Z.** 2009. Detection of protein ubiquitination. *Journal of visualized*  
456 *experiments : JoVE* **19**:1293.
- 457
- 458

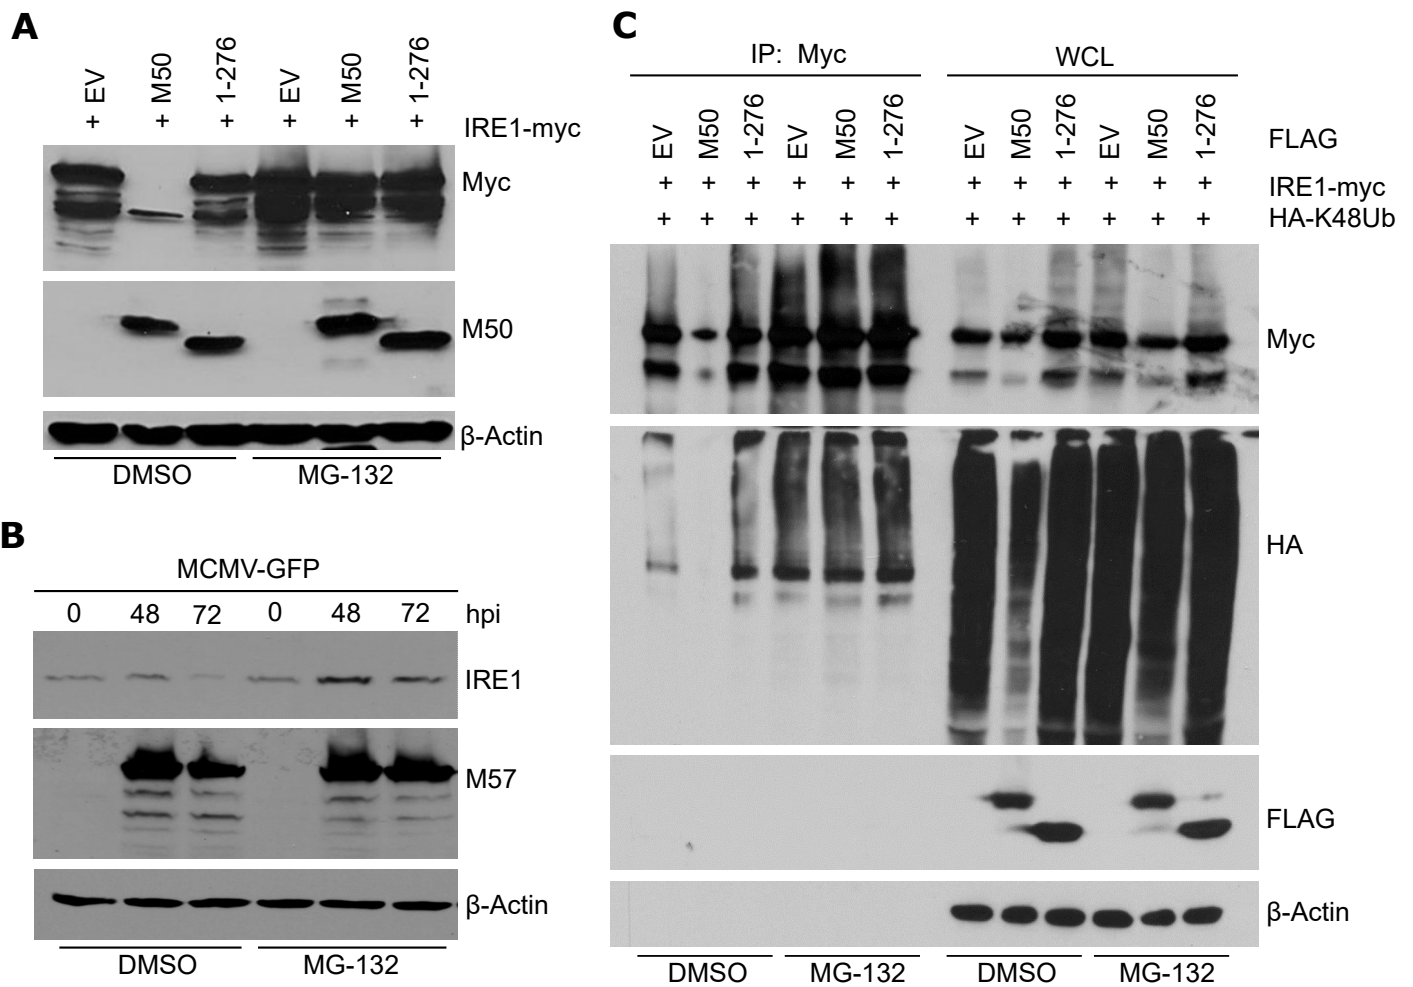

**Figure 1. M50-mediated IRE1 degradation is blocked by proteasome inhibitor MG132.**

(A) MEFs were transfected with plasmids expressing myc-tagged IRE1 and full-length or truncated (1-276) M50 or empty vector (EV). Cells were treated with 25  $\mu$ M MG-132 or DMSO for the last 5.5 hrs before harvesting of lysates at 48 hrs post transfection. (B) MEFs were infected with MCMV-GFP (MOI=3). Cells were treated with 30  $\mu$ M MG-132 or DMSO for the last 6 hrs before harvesting. Cell lysates were analyzed by immunoblot. M57 was detected as an infection control. (C) MEFs were transfected with plasmids expressing HA-tagged K48-only ubiquitin and plasmids as in A. Cells were treated with 30  $\mu$ M MG-132 or DMSO for the last 6 hrs before harvesting of lysates at 48 hrs post transfection. IRE1 was immunoprecipitated with an anti-myc antibody. Ubiquitylated proteins in whole cell lysates (WCL) and in the immunoprecipitated samples were detected by immunoblot with an anti-HA antibody.



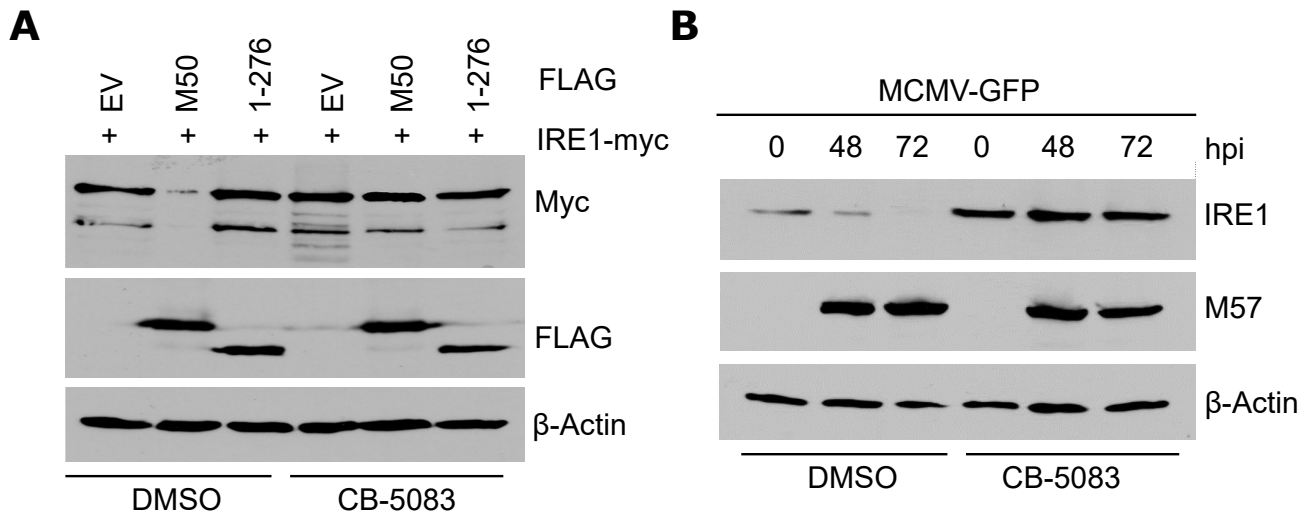

**Figure 2. M50-mediated IRE1 degradation is blocked by p97/VCP inhibitor CB-5083.**

(A) MEFs were transfected with plasmids expressing myc-tagged IRE1 and FLAG-tagged full-length or truncated (1-276) M50 or empty vector (EV). Cells were treated with 30  $\mu$ M CB-5083 or DMSO for the last 6 hrs before harvesting of lysates at 48 hrs post transfection. (B) MEFs were infected with MCMV-GFP (MOI=3). Cells were treated with 30  $\mu$ M CB-5083 or DMSO for the last 6 hrs before harvesting. Cell lysates were analyzed by immunoblot. M57 was detected as an infection control.

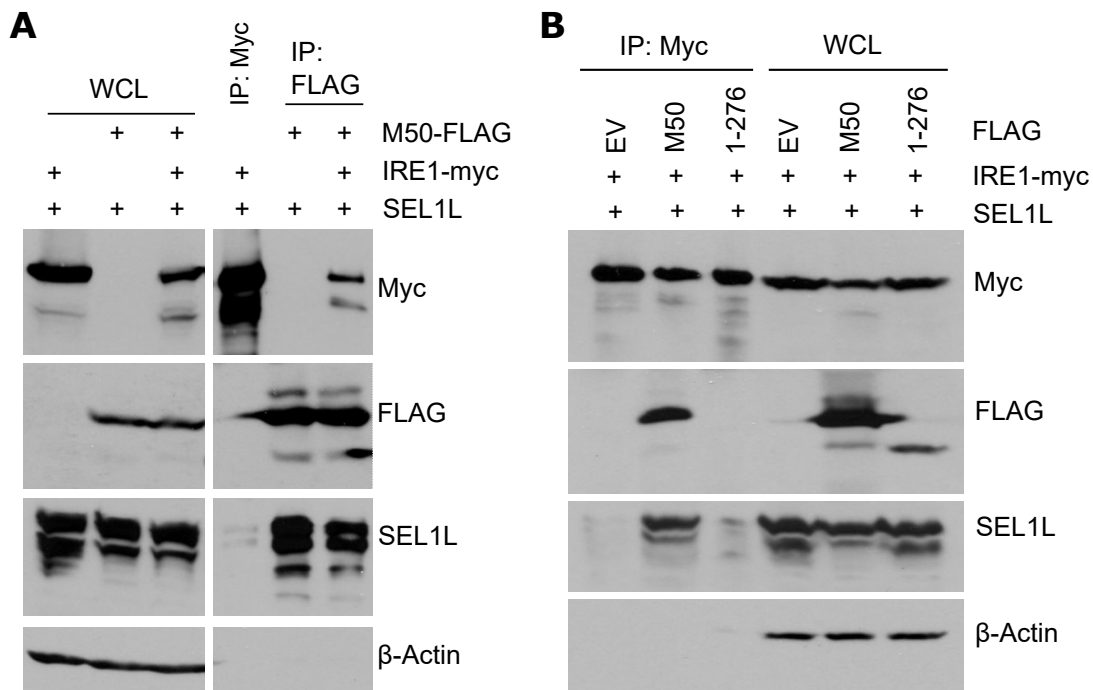

**Figure 3. M50 interacts with IRE1 and SEL1L.** (A) HEK 293A cells were transfected with a plasmids expressing SEL1L, Myc-tagged IRE1, and FLAG-tagged M50. IRE1-myc or M50-FLAG was immunoprecipitated. (B) HEK 293A cells were transfected with a plasmids expressing SEL1L, Myc-tagged IRE1, and FLAG-tagged full-length or truncated (1-276) M50 or empty vector (EV). IRE1 was immunoprecipitated with an anti-myc antibody. Proteins in whole cell lysates (WCL) and the immunoprecipitated samples were detected by immunoblot.

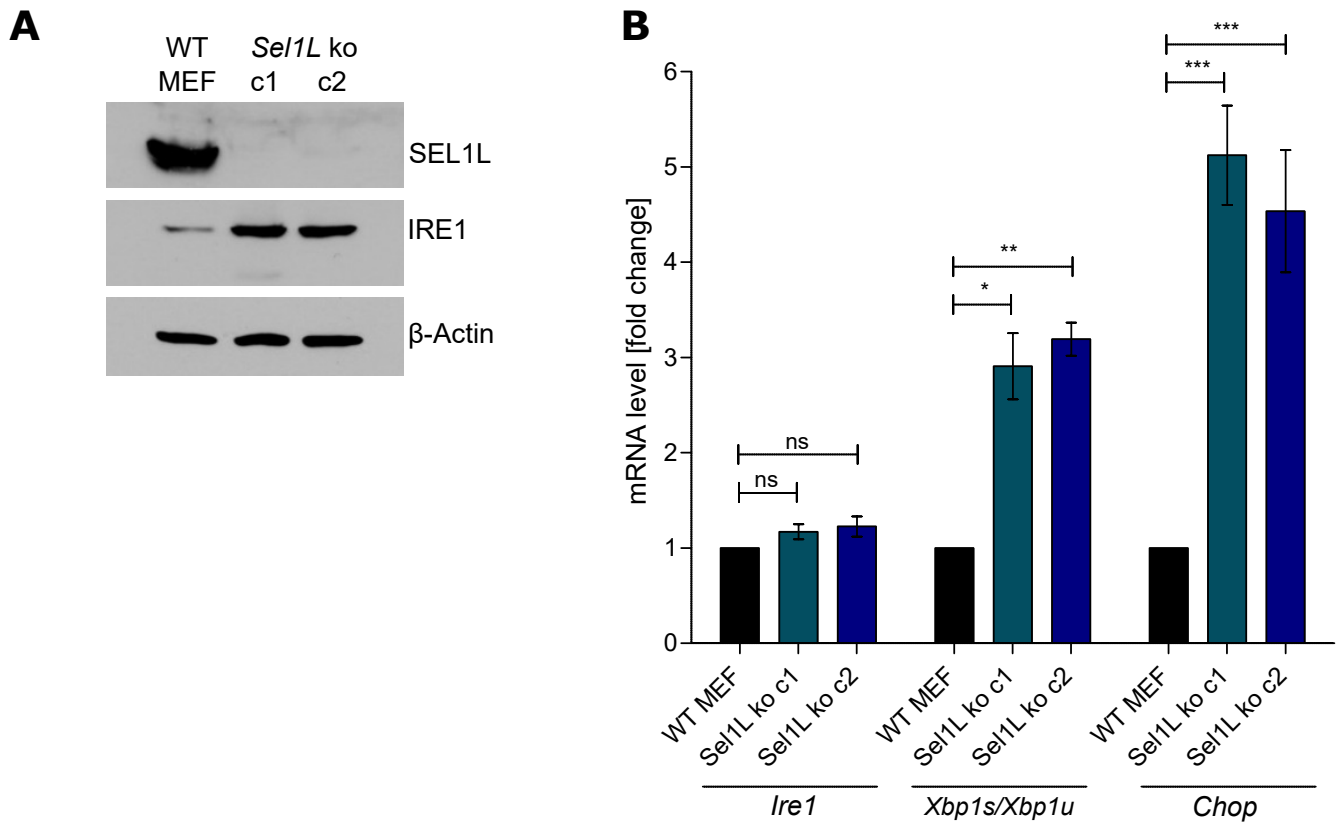

**Figure 4. Generation of SEL1L-deficient MEFs.** (A) *Sel1L* knockout MEFs were generated by CRISPR/Cas9 gene editing. Two independent clones obtained with different gRNAs are shown. SEL1L and IRE1 protein levels were analyzed by immunoblot. (B) Total RNA was isolated from WT and *Sel1L* knockout MEFs. mRNA levels of *Ire1*, *Chop*, *Xbp1s*, and *Xbp1u* were determined by qRT-PCR. *Gapdh* was used for normalization. Fold changes (*Sel1L* knockout compared to WT MEFs) are shown as means  $\pm$ SEM of three biological replicates. \*,  $p < 0.05$ ; \*\*,  $p < 0.01$ ; \*\*\*,  $p < 0.001$ .

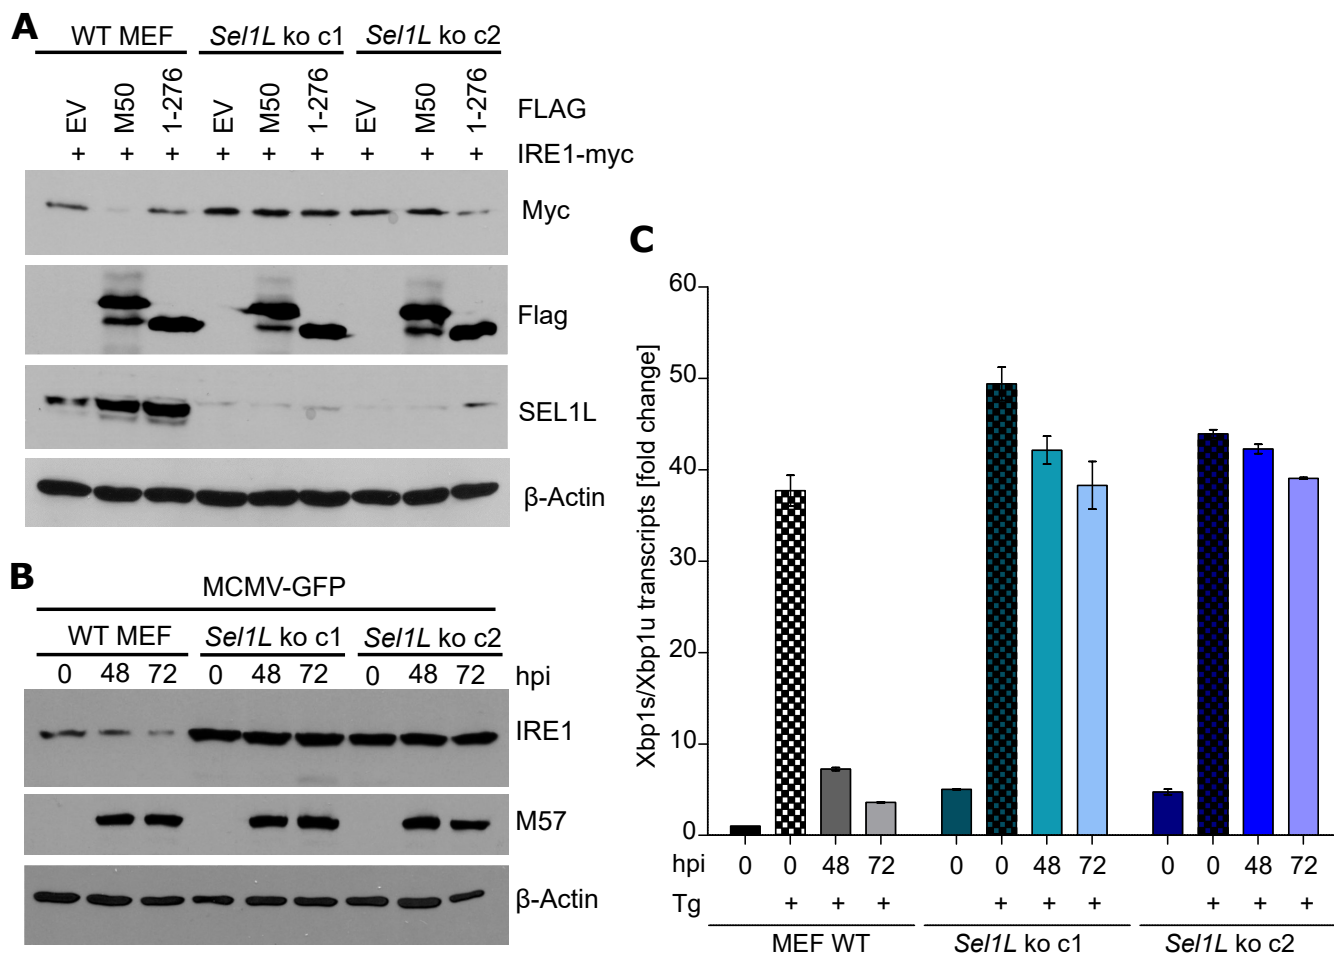

**Figure 5. M50-mediated IRE1 degradation is abolished in SEL1L-deficient cells.** (A) WT and *Sel1L* knockout MEFs were transfected with plasmids expressing myc-tagged IRE1 and full-length or truncated (1-276) M50 or empty vector (EV). Cell lysates were harvested 48 hours post transfection. (B) WT and *Sel1L* knockout MEFs were infected with MCMV-GFP (MOI=3). Cell lysates were analyzed by immunoblot. M57 was detected as an infection control. (C) WT and *Sel1L* knockout MEFs were MCMV-infected as in B and treated for 5 h with 60 nM thapsigargin (Tg). Total RNA was isolated and mRNA levels of *Xbp1s* and *Xbp1u* were determined by qRT-PCR. *Gapdh* was used for normalization. Fold changes relative to untreated WT MEFs are shown as means  $\pm$ SEM of three biological replicates.

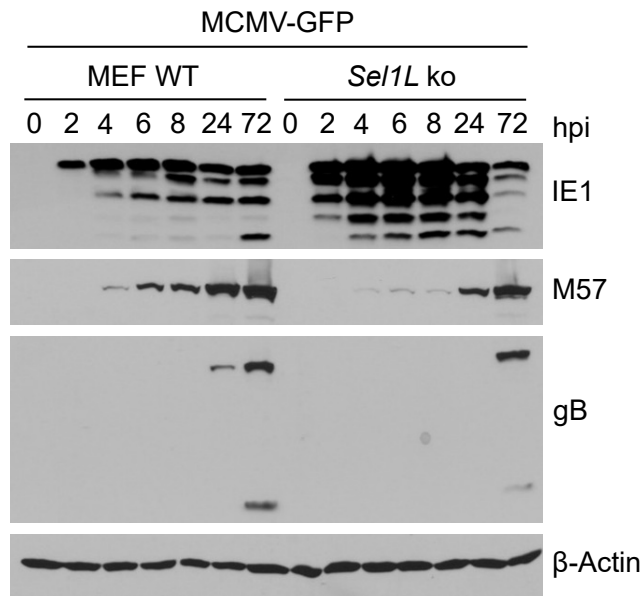

**Figure 6. *Se11L* knockout affects viral gene expression.**

WT and *Se11L* knockout MEFs were infected with MCMV-GFP (MOI=3). Cell lysates were harvested at different times post infection. Expression of the immediate-early 1 (IE1), the early M57 protein, and the late glycoprotein B (gB) were analyzed by immunoblot.

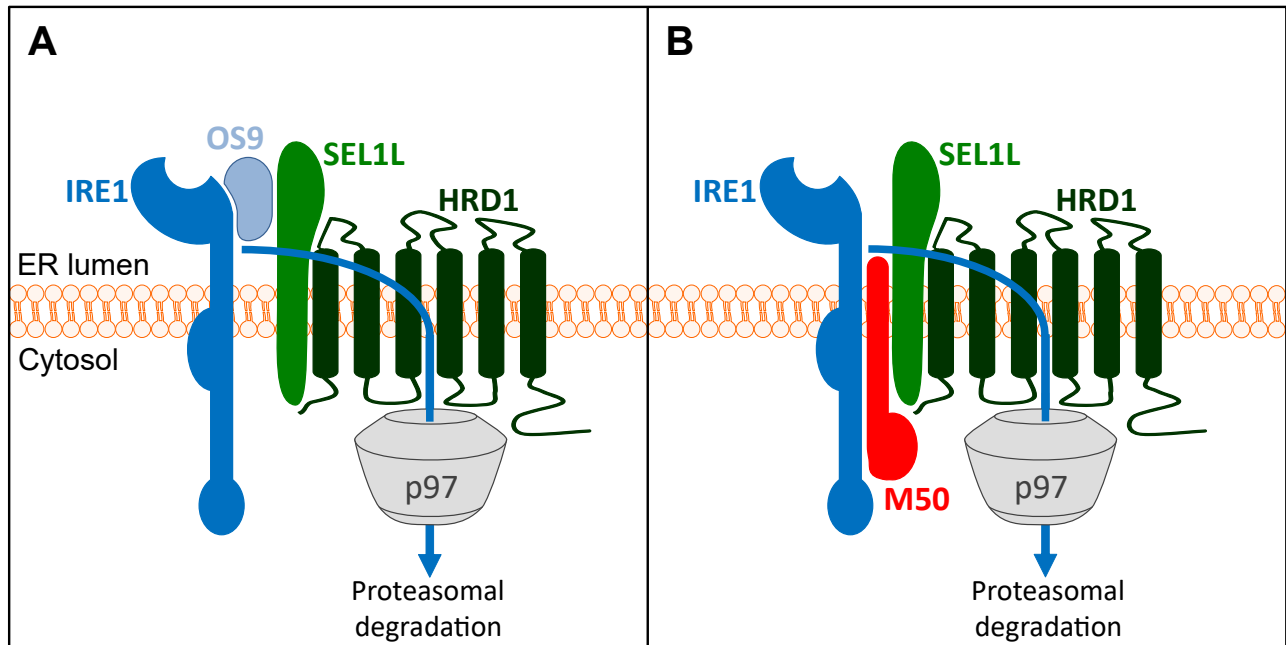

**Figure 7. M50-mediated IRE1 degradation via ERAD (model).** (A) The natural turnover of IRE1 involves binding to the cellular substrate recognition factor OS9, which recruits misfolded proteins to the SEL1L-HRD1 complex. IRE1 is ubiquitylated by HRD1 and dislocated into the cytosol by the AAA ATPase p97/VCP. (B) The MCMV M50 protein functions as a viral adaptor protein that tethers IRE1 to SEL1L, thereby promoting IRE1 degradation.
